# Supplementary material for: Pash 3.0: A versatile software package for read mapping and integrative analysis of genomic and epigenomic variation using massively parallel DNA sequencing
Source: Springer Nature journal article supplement (doi:10.1186/1471-2105-11-572), 2010-11-23
Supplement: 12859_2010_4155_MOESM1_ESM.pdf [file 12859_2010_4155_MOESM1_ESM.pdf]

### A. Multi-positional hash table

|          |       |       |       |         |
|----------|-------|-------|-------|---------|
| $K_1$    | $I_1$ | $o_1$ | $I_2$ | $o'_1$  |
| $\vdots$ |       |       |       |         |
| $K_2$    | $I_1$ | $o_2$ | $I_3$ | $o''_1$ |
| $\vdots$ |       |       |       |         |
| $K_3$    | $I_1$ | $o_3$ | $I_2$ | $o'_2$  |
| $\vdots$ |       |       |       |         |
| $K_4$    | $I_1$ | $o_4$ | $I_3$ | $o''_2$ |

### C. Gapped Alignment at k-mer-level

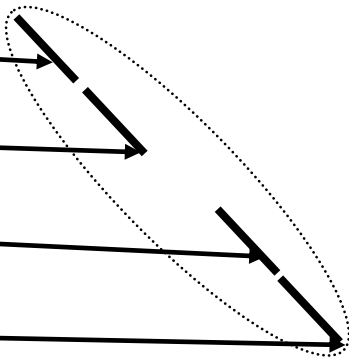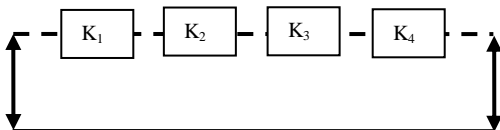

### B. Genomic Window
