# Supplementary material for: Pash 3.0: A versatile software package for read mapping and integrative analysis of genomic and epigenomic variation using massively parallel DNA sequencing
Source: Springer Nature journal article supplement (doi:10.1186/1471-2105-11-572), 2010-11-23
Supplement: 12859_2010_4155_MOESM2_ESM.pdf [file 12859_2010_4155_MOESM2_ESM.pdf]

**a. Bisulfite Treatment**

**m**  
**ACGGCATG**  
↓  
**ACGGTATG**

**b. Exploring possible read k-mers**

**ACGGTATG**

↗

↘

**ACGGTATG**  
**ACGGTACG**  
**ACGGCATG**  
**ACGGCACG**
