# Supplementary material for: Pash 3.0: A versatile software package for read mapping and integrative analysis of genomic and epigenomic variation using massively parallel DNA sequencing
Source: Springer Nature journal article supplement (doi:10.1186/1471-2105-11-572), 2010-11-23
Supplement: 12859_2010_4155_MOESM3_ESM.pdf [file 12859_2010_4155_MOESM3_ESM.pdf]

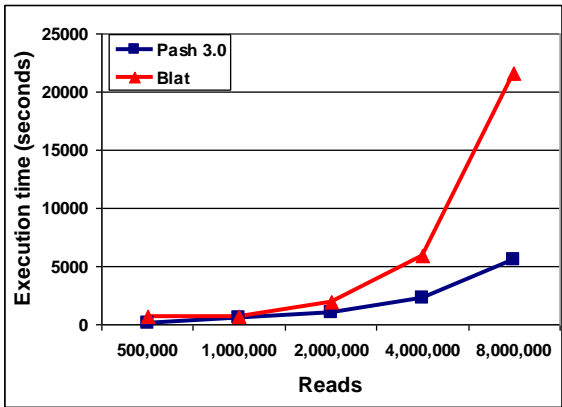

1. 25% coevolution , 1% divergence

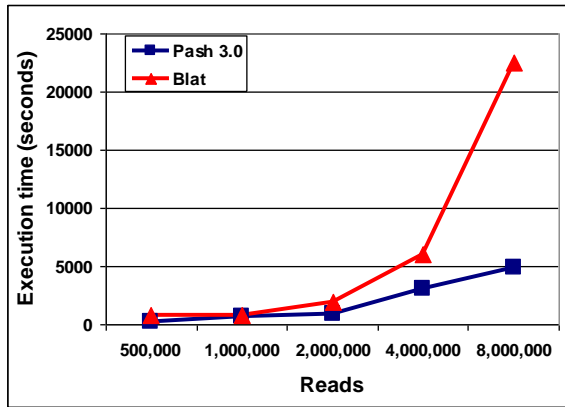

2. 25% coevolution, 5% divergence
